# Supplementary material
Source: bioRxiv or medRxiv preprint supplement (https://www.biorxiv.org/content/biorxiv/early/2021/04/26/2020.07.07.192039/DC1/embed/media-1.pdf)
Supplement: Supplementary file [file media-1.pdf]

## **SUPPORTING INFORMATION**

### **Evolutionary dynamics of sex-biased genes expressed in cricket brains and gonads**

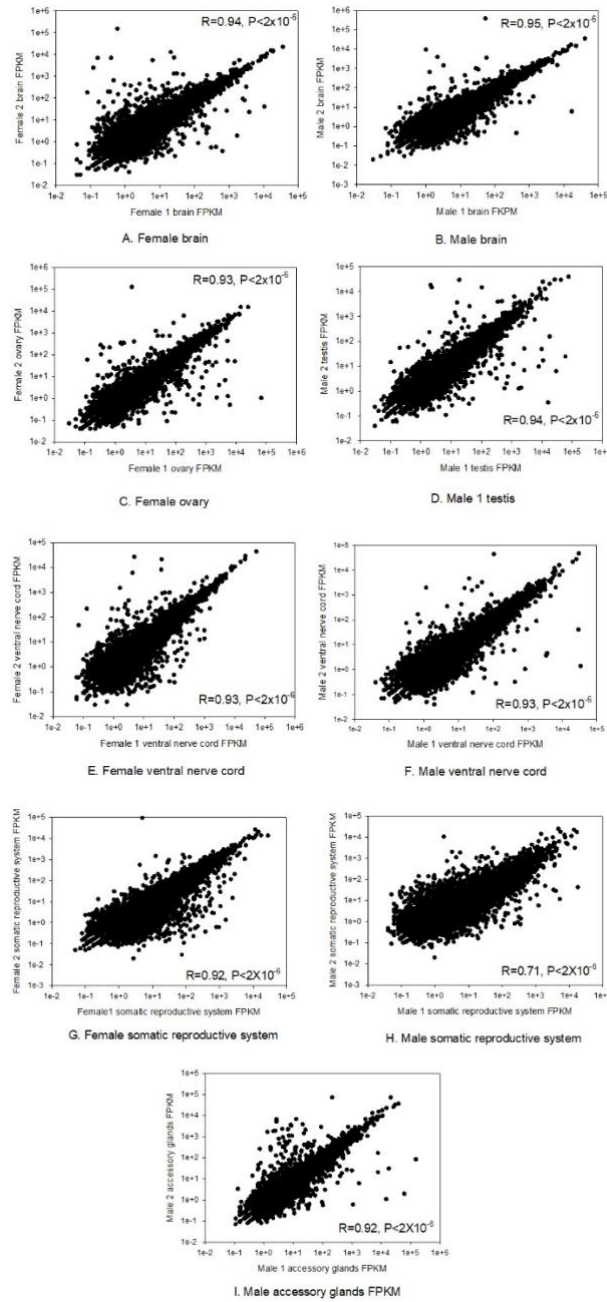

**Fig. S1.** The Spearman correlation (R) in FPKM across all 15,539 genes in *G. bimaculatus* for each of the tissues under study. A) female brain; B) male brain; C) ovary; D) testis; E) female ventral nerve cord; F) male ventral nerve cord; G) female somatic reproductive system; H) male somatic reproductive system; I) male accessory glands.

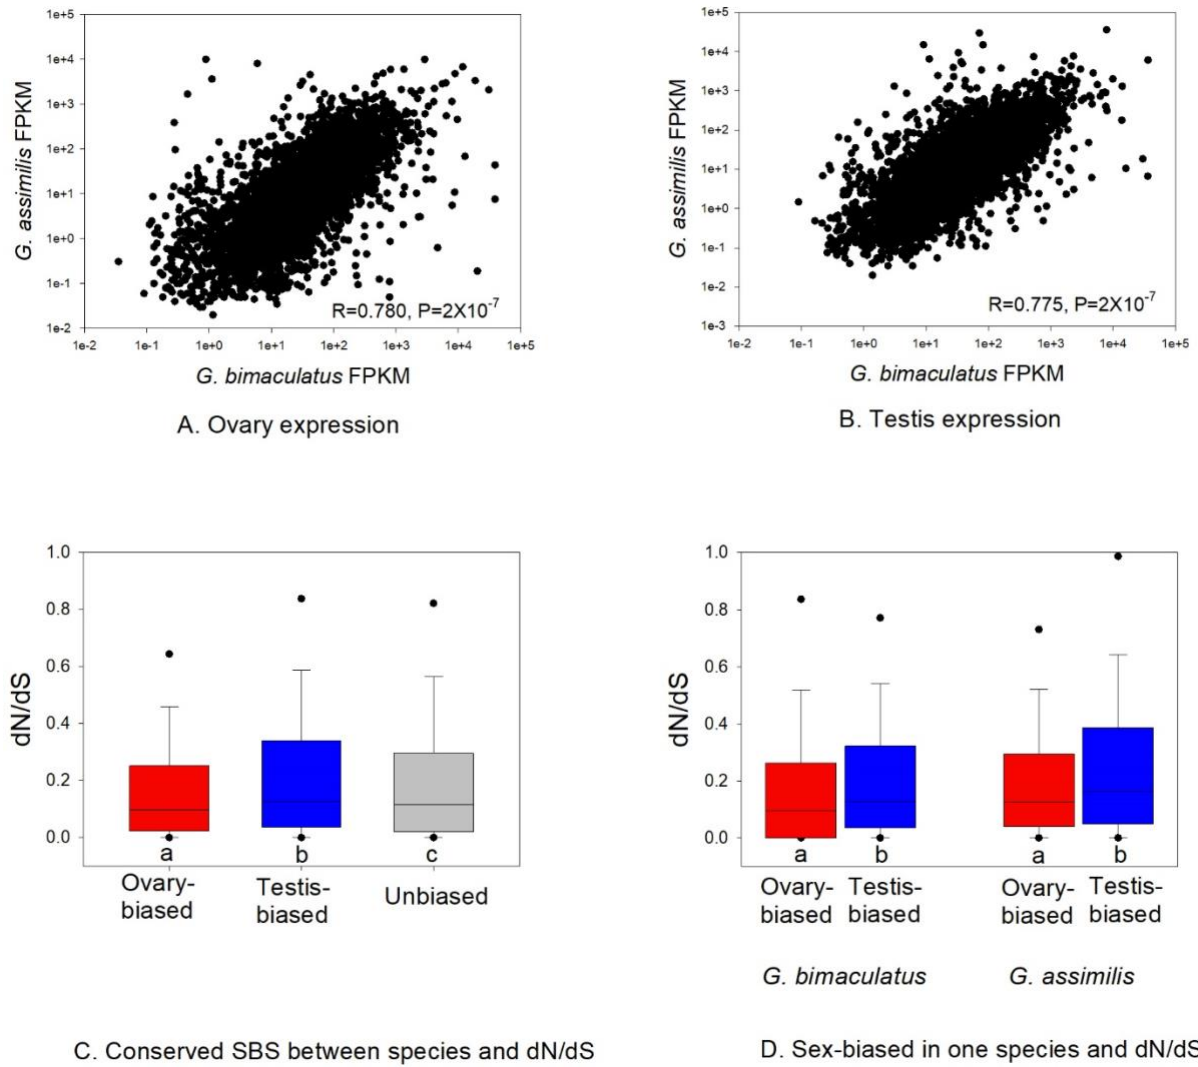

**Fig. S2.** Expression of genes in *G. bimaculatus* and *G. assimilis* for A) ovaries and B) testes (Spearman's R and P are shown; expression per gene is the average across samples per species). C) Box plots of dN/dS for genes that have the same sex-biased status (SBS) in both *G. bimaculatus* and *G. assimilis* and; D) Box plots of dN/dS for genes that are ovary-biased or testis-biased in only one species. Different letters under bars in C and each pair of bars in D indicate MWU-P < 0.05.

**Table S1.** The RNA-seq datasets for each of the male and female tissue types under study for *G. bimaculatus*. The number of reads (single-end) before and after trimming with BBduk (<https://jgi.doe.gov/data-and-tools/bbtools/>) is shown. The data are available at the Short Read Archive (SRA) under the project identifier PRJNXXXXXX.

| Sample   | Tissue                      | Sample Name   | No. Reads       |                |
|----------|-----------------------------|---------------|-----------------|----------------|
|          |                             |               | Before trimming | After trimming |
| Male 1   | Accessory gland             | AK-28_S6.R1   | 8,519,999       | 8,455,381      |
|          | Brain                       | AK-25_S3.R1   | 10,927,264      | 10,543,501     |
|          | Somatic reproductive system | SHC-18_S14.R1 | 32,497,283      | 32,430,843     |
|          | Testes                      | SHC-17_S13.R1 | 19,928,912      | 19,751,731     |
|          | Ventral nerve cord          | AK-26_S4.R1   | 11,488,521      | 11,140,299     |
| Male 2   | Accessory gland             | AK-35_S13.R1  | 15,110,718      | 14,973,668     |
|          | Brain                       | AK-32_S10.R1  | 18,039,328      | 17,850,399     |
|          | Somatic reproductive system | AK-31_S9.R1   | 11,993,680      | 11,702,596     |
|          | Testes                      | AK-30_S8.R1   | 13,672,147      | 13,529,248     |
|          | Ventral nerve cord          | AK-33_S11.R1  | 11,677,747      | 11,445,159     |
| Female 1 | Brain                       | AK-39_S17.R1  | 13,920,966      | 13,750,206     |
|          | Ovary                       | AK-37_S15.R1  | 21,725,208      | 21,128,416     |
|          | Somatic reproductive system | AK-38_S16.R1  | 13,870,827      | 13,718,497     |
|          | Ventral nerve cord          | AK-40_S18.R1  | 12,599,661      | 12,341,413     |
| Female 2 | Brain                       | AK-45_S23.R1  | 19,312,301      | 19,036,974     |
|          | Ovary                       | AK-43_S21.R1  | 27,627,122      | 27,049,583     |
|          | Somatic reproductive system | AK-44_S22.R1  | 11,688,814      | 11,539,571     |
|          | Ventral nerve cord          | AK-46_S24.R1  | 13,591,143      | 13,143,568     |

**Table S2.** The RNA-seq datasets for each of the male and female tissue types under study for *G. assimilis*. The number of reads (single-end) before and after trimming with BBduk is shown. All tissue samples were used for the RNA-seq assembly, and \* indicates those samples used for gonadal expression (Exp.) analyses for comparison to *G. bimaculatus* tissue samples. The data are available at the Short Read Archive (SRA) under the project identifier PRJNAXXXXXX.

| Sample          | Tissue <sup>a</sup>         | File Name          | No. Reads       |                          | Exp. |
|-----------------|-----------------------------|--------------------|-----------------|--------------------------|------|
|                 |                             |                    | Before trimming | After trimming           |      |
| <b>Male 1</b>   | Accessory gland             | AK_1-6_S6_R1_001   | 7,232,269       | 6,927,036                |      |
|                 | Brain                       | AK_1-3_S3_R1_001   | 414,137         | 397,903                  |      |
|                 | Carcass                     | AK_1-5_S5_R1_001   | 12,162,122      | 11,909,287               |      |
|                 | Somatic reproductive system | AK_1-2_S2_R1_001   | 9,786,892       | 9,218,317                |      |
|                 | Testes                      | AK_1-1_S1_R1_001   | 15,489,005      | 14,677,775               |      |
|                 | Ventral nerve cord          | AK_1-4_S4_R1_001   | 8,085,561       | 7,778,520                |      |
| <b>Male 2</b>   | Accessory gland             | AK_1-12_S12_R1_001 | 9,684,938       | 9,395,491                |      |
|                 | Brain                       | AK_1-9_S9_R1_001   | 10,251,515      | 9,935,844                |      |
|                 | Carcass                     | AK_1-11_S11_R1_001 | 13,140,136      | 12,739,689               |      |
|                 | Somatic reproductive system | AK_1-8_S8_R1_001   | 9,038,153       | 8,700,106                |      |
|                 | Testes                      | AK_1-7_S7_R1_001   | 15,015,495      | 14,252,214               | *    |
|                 | Ventral nerve cord          | AK_1-10_S10_R1_001 | 159,249,632     | 153,314,813 <sup>b</sup> |      |
| <b>Male 3</b>   | Accessory gland             | AK_1-18_S18_R1_001 | 9,301,332       | 8,771,926                |      |
|                 | Brain                       | AK_1-15_S15_R1_001 | 8,556,018       | 8,269,869                |      |
|                 | Carcass                     | AK_1-17_S17_R1_001 | 11,258,971      | 11,016,352               |      |
|                 | Somatic reproductive system | AK_1-14_S14_R1_001 | 11,468,584      | 11,055,961               |      |
|                 | Testes                      | AK_1-13_S13_R1_001 | 11,082,626      | 10,637,566               | *    |
|                 | Ventral nerve cord          | AK_1-16_S16_R1_001 | 9,501,325       | 9,141,580                |      |
| <b>Female 1</b> | Brain                       | AK_1-21_S21_R1_001 | 12,314,902      | 11,529,951               |      |
|                 | Carcass                     | AK_1-23_S23_R1_001 | 10,318,471      | 9,965,655                |      |
|                 | Ovary                       | AK_1-19_S19_R1_001 | 12,968,675      | 12,330,995               | *    |

|                 |                             |                    |            |            |   |
|-----------------|-----------------------------|--------------------|------------|------------|---|
|                 | Somatic reproductive system | AK_1-20_S20_R1_001 | 20,180,007 | 19,613,713 |   |
|                 | Ventral nerve cord          | AK_1-22_S22_R1_001 | 13,818,212 | 13,322,784 |   |
| <b>Female 2</b> | Brain                       | AK_1-26_S26_R1_001 | 10,596,275 | 10,191,182 |   |
|                 | Carcass                     | AK_1-28_S28_R1_001 | 9,471,179  | 8,987,504  |   |
|                 | Ovary                       | AK_1-24_S24_R1_001 | 14,894,350 | 14,584,072 | * |
|                 | Somatic reproductive system | AK_1-25_S25_R1_001 | 10,705,738 | 10,183,713 |   |
|                 | Ventral nerve cord          | AK_1-27_S27_R1_001 | 10,108,946 | 9,733,477  |   |
| <b>Female 3</b> | Brain                       | AK_1-31_S31_R1_001 | 9,543,257  | 9,388,801  |   |
|                 | Carcass                     | AK_1-33_S33_R1_001 | 14,562,167 | 14,279,995 |   |
|                 | Ovary                       | AK_1-29_S29_R1_001 | 10,900,114 | 10,725,546 |   |
|                 | Somatic reproductive system | AK_1-30_S30_R1_001 | 9,846,659  | 9,641,174  |   |
|                 | Ventral nerve cord          | AK_1-32_S32_R1_001 | 7,954,359  | 7,795,480  |   |

<sup>a</sup> The carcass consists of body and head (minus the legs, wings, antennae, gut, Malpighian tubules, gonad and somatic reproductive system, ventral nerve cord, and brain); <sup>b</sup>The sample was divided into tenths and one-tenth of the reads were randomly used for assembly and expression analysis to approximately match the read number of other samples.

**Table S3.** The number of genes in *G. bimaculatus* under study for dN/dS (those with between-species orthologs) that had female- or male-biased expression in one (of four) paired tissue types and were unbiased in expression for the three remaining tissue types (tissue-specific sex bias, TSSB). Genes with shared sex-biased status in two of four tissues (and unbiased in two) or other types of variation in SBS are also shown.

|                                                                   | Number of Genes |              |
|-------------------------------------------------------------------|-----------------|--------------|
|                                                                   | Female-biased   | Male-biased  |
| <b><u>Sex-biased one tissue and unbiased in three tissues</u></b> |                 |              |
| <b><u>(TSSB, N=3,375)</u></b>                                     |                 |              |
| Gonad                                                             | 1,858           | 1,055        |
| Somatic reproductive system                                       | 113             | 126          |
| Brain                                                             | 6               | 16           |
| Ventral nerve cord                                                | 82              | 119          |
| <b><u>Shared status in two tissues N=226</u></b>                  |                 |              |
|                                                                   |                 |              |
| Gonad and somatic reproductive system                             | 37              | 67           |
| Gonad and brain                                                   | 3               | 7            |
| Gonad and ventral nerve cord                                      | 56              | 44           |
| Brain and somatic reproductive system                             | 1               | 6            |
| Brain and ventral nerve cord                                      | 1               | 4            |
| <b><u>Other status</u></b>                                        |                 |              |
|                                                                   |                 | Other status |
| Universally unbiased                                              |                 | 3,449        |
| Variable: multiple sex-biased statuses among tissues              |                 | 170          |
| <b>Total number of genes in all categories</b>                    |                 | <b>7,220</b> |

**Table S4.** The top GO functional classifications of genes with sex-biased brain expression (all genes regardless of interspecies orthologs, N values in Fig. 2). Annotation was determined in DAVID (Huang da et al., 2009) using *D. melanogaster* orthologs to *G. bimaculatus* genes. Functions are ranked by the percentage of genes matching its classification. P-values indicate the enrichment of genes involved in each function with lower values indicating greater enrichment.

| <b>Female-biased brain genes</b>                                     | <b>Percent of Genes</b> | <b>P-value</b> |
|----------------------------------------------------------------------|-------------------------|----------------|
| Positive regulation of transcription from RNA polymerase II promoter | 12.1                    | 1.10E-02       |
| Sensory perception of pain                                           | 12.1                    | 3.40E-02       |
| Transcription, DNA-templated                                         | 12.1                    | 4.20E-02       |
| <b>Male-biased brain genes</b>                                       |                         |                |
| Proteolysis                                                          | 11.3                    | 2.90E-04       |
| Calcium ion binding                                                  | 8.5                     | 6.70E-03       |
| Neuron remodeling                                                    | 4.2                     | 2.10E-02       |



**Table S5.** The top GO functional classifications of genes with universally unbiased expression across all four paired male-female tissue types under study (those with interspecies orthologs for study). Annotation was determined in DAVID (Huang da et al., 2009) using *D. melanogaster* orthologs to *G. bimaculatus* genes. Functions are ranked by the percentage of genes matching its classification and those categories representing 5% or more of genes are shown. P-values indicate the enrichment of genes involved in each function with lower values indicating greater enrichment.

| GO keyword            | Percent<br>of genes | P-value  |
|-----------------------|---------------------|----------|
| Coiled coil           | 16.1                | 5.20E-16 |
| Hydrolase             | 12.9                | 4.00E-03 |
| Transferase           | 12.4                | 2.40E-21 |
| Nucleus               | 11.2                | 8.30E-10 |
| Phosphoprotein        | 11                  | 3.40E-22 |
| Metal-binding         | 10.8                | 6.00E-14 |
| Nucleotide-binding    | 8.3                 | 2.50E-15 |
| Alternative splicing  | 8.1                 | 4.40E-20 |
| Cytoplasm             | 8                   | 1.00E-17 |
| ATP-binding           | 7                   | 3.00E-16 |
| Developmental protein | 6.7                 | 5.20E-11 |
| Zinc                  | 6.6                 | 1.20E-09 |
| Transport             | 5.1                 | 1.70E-03 |
| Oxidoreductase        | 5.0                 | 4.30E-02 |

**Table S6.** The 30 genes that were expressed specifically in the male accessory glands and not in any of the eight other (male and female) tissue types in *G. bimaculatus*. The genes that had high confidence ortholog matches between *G. bimaculatus* and *G. assimilis* are shown (N=1, indicated by \*), as well as those with putative orthologs identified in *D. melanogaster* (N=7), which had less strict criteria (for identification of a match for gene ontology purposes; See Methods). Gene functions were predicted using DAVID and *D. melanogaster* gene identifiers (Huang da et al., 2009).

| Row | <i>G. bimaculatus</i><br>gene | <i>D. melanogaster</i><br>match | Gene                                       | GO putative functions                             | Expression<br>(FPKM) | dN/dS  |
|-----|-------------------------------|---------------------------------|--------------------------------------------|---------------------------------------------------|----------------------|--------|
| 1   | GBI_11980-RA*                 | FBgn0035154                     | CG3344                                     | Peptidase S10, serine carboxypeptidase            | 19.46                | 0.1039 |
| 2   | GBI_06110-RA                  | FBgn0035781                     | CG8560                                     | proteolysis                                       | 9.60                 | -      |
| 3   | GBI_00239-RA                  | FBgn0039084                     | CG10175                                    | neuron cell-cell adhesion, synaptic transmission  | 0.83                 | -      |
| 4   | GBI_14669-RA                  | FBgn0259215                     | <i>Ionotropic receptor<br/>93a (Ir93a)</i> | detection of chemical stimulus sensory perception | 0.70                 | -      |
| 5   | GBI_18443-RA                  | FBgn0035476                     | CG12766                                    | oxidation-reduction process                       | 0.34                 | -      |
| 6   | GBI_06560-RA                  | FBgn0024288                     | <i>Sox100B</i>                             | male gonad development                            | 0.27                 | -      |
| 7   | GBI_04401-RA                  | FBgn0060296                     | <i>painless(pain)</i>                      | copulation, male courtship behavior, olfactory    | 0.08                 | -      |
| 8   | GBI_08022-RA                  | No match                        | -                                          | -                                                 | 347.25               | -      |
| 9   | GBI_00292-RA                  | No match                        | -                                          | -                                                 | 120.78               | -      |
| 10  | GBI_13609-RA                  | No match                        | -                                          | -                                                 | 41.80                | -      |
| 11  | GBI_13241-RA                  | No match                        | -                                          | -                                                 | 20.21                | -      |
| 12  | GBI_14160-RA                  | No match                        | -                                          | -                                                 | 16.75                | -      |
| 13  | GBI_01608-RA                  | No match                        | -                                          | -                                                 | 15.96                | -      |
| 14  | GBI_05352-RA                  | No match                        | -                                          | -                                                 | 8.13                 | -      |
| 15  | GBI_06938-RA                  | No match                        | -                                          | -                                                 | 5.72                 | -      |
| 16  | GBI_21228-RA                  | No match                        | -                                          | -                                                 | 5.29                 | -      |
| 17  | GBI_09340-RA                  | No match                        | -                                          | -                                                 | 3.41                 | -      |
| 18  | GBI_17179-RA                  | No match                        | -                                          | -                                                 | 3.39                 | -      |
| 19  | GBI_18175-RA                  | No match                        | -                                          | -                                                 | 1.42                 | -      |
| 20  | GBI_03401-RA                  | No match                        | -                                          | -                                                 | 1.21                 | -      |
| 21  | GBI_06890-RA                  | No match                        | -                                          | -                                                 | 1.15                 | -      |
| 22  | GBI_06913-RA                  | No match                        | -                                          | -                                                 | 1.08                 | -      |

|    |              |          |   |   |                 |   |
|----|--------------|----------|---|---|-----------------|---|
| 23 | GBI_02473-RA | No match | - | - | 0.92            | - |
| 24 | GBI_02976-RA | No match | - | - | 0.74            | - |
| 25 | GBI_05550-RA | No match | - | - | 0.6             | - |
| 26 | GBI_00099-RA | No match | - | - | 0.49            | - |
| 27 | GBI_11938-RA | No match | - | - | 0.35            | - |
| 28 | GBI_16483-RA | No match | - | - | 0.35            | - |
| 29 | GBI_07340-RA | No match | - | - | 0.29            | - |
| 30 | GBI_04232-RA | No match | - | - | >0 <sup>a</sup> | - |

<sup>a</sup> Highly variable FPKM among individuals and thus denoted as >0 FPKM.

**Table S7.** The 134 seminal fluid protein (SFPs) genes for the species *D. melanogaster* from Sepil et al. 2019 (Sepil et al., 2019) and their best BLASTX matches in the 15,539 genes of *G. bimaculatus*. Due to the extended phylogenetic distance between species, the list shows all putative orthologs identified using single forward BLASTX of *G. bimaculatus* to *D. melanogaster* using BLASTX (e<0.001). Results for those contained within the 7,220 genes with high confidence orthologs between *G. bimaculatus* and *G. assimilis* are shown in Table 4 within the main text.

| Row | <i>D. melanogaster</i> ID | SFP gene name      | Match in <i>G. bimaculatus</i> |
|-----|---------------------------|--------------------|--------------------------------|
| 1   | FBgn0002855               | <i>Acp26Aa</i>     | -                              |
| 2   | FBgn0002856               | <i>Acp26Ab</i>     | -                              |
| 3   | FBgn0015583               | <i>Acp29AB</i>     | -                              |
| 4   | FBgn0267327               | <i>Acp33A</i>      | -                              |
| 5   | FBgn0011559               | <i>Acp36DE</i>     | -                              |
| 6   | FBgn0034152               | <i>Acp53C14a</i>   | -                              |
| 7   | FBgn0034153               | <i>Acp53C14b</i>   | -                              |
| 8   | FBgn0053530               | <i>Acp53C14c</i>   | -                              |
| 9   | FBgn0015584               | <i>Acp53Ea</i>     | -                              |
| 10  | FBgn0020509               | <i>Acp62F</i>      | -                              |
| 11  | FBgn0015585               | <i>Acp63F</i>      | -                              |
| 12  | FBgn0015586               | <i>Acp76A</i>      | -                              |
| 13  | FBgn0003884               | <i>alphaTub84B</i> | GBI_00369-RA                   |
| 14  | FBgn0050488               | <i>antr</i>        | -                              |
| 15  | FBgn0039598               | <i>aqrs</i>        | -                              |
| 16  | FBgn0003889               | <i>betaTub85D</i>  | -                              |
| 17  | FBgn0047334               | <i>BG642312</i>    | -                              |
| 18  | FBgn0054002               | <i>BP1025</i>      | -                              |
| 19  | FBgn0038014               | CG10041            | GBI_00322-RA*                  |
| 20  | FBgn0260766               | CG42564            | -                              |
| 21  | FBgn0038395               | CG10407            | GBI_00641-RA*                  |
| 22  | FBgn0037039               | CG10587            | -                              |
| 23  | FBgn0032853               | CG10651            | -                              |
| 24  | FBgn0032843               | CG10730            | -                              |
| 25  | FBgn0037038               | CG11037            | -                              |
| 26  | FBgn0033164               | CG11112            | -                              |
| 27  | FBgn0038067               | CG11598            | -                              |
| 28  | FBgn0038069               | CG11608            | -                              |
| 29  | FBgn0250847               | CG14034            | -                              |
| 30  | FBgn0034417               | CG15117            | GBI_01865-RA                   |
| 31  | FBgn0031617               | CG15635            | -                              |
| 32  | FBgn0030643               | CG15641            | -                              |

---

|    |             |               |              |
|----|-------------|---------------|--------------|
| 33 | FBgn0033167 | CG1701        | -            |
| 34 | FBgn0051872 | CG31872       | -            |
| 35 | FBgn0265264 | CG17097       | -            |
| 36 | FBgn0250841 | CG17242       | -            |
| 37 | FBgn0032868 | CG17472       | -            |
| 38 | FBgn0250842 | CG17575       | -            |
| 39 | FBgn0038919 | <i>Qsox2</i>  | -            |
| 40 | FBgn0037433 | CG17919       | GBI_09042-RB |
| 41 | FBgn0034512 | CG18067       | -            |
| 42 | FBgn0036837 | CG18135       | -            |
| 43 | FBgn0043825 | CG18284       | -            |
| 44 | FBgn0034753 | CG2852        | GBI_11684-RA |
| 45 | FBgn0050395 | CG30395       | -            |
| 46 | FBgn0050486 | CG30486       | -            |
| 47 | FBgn0051418 | CG31418       | -            |
| 48 | FBgn0051419 | CG31419       | -            |
| 49 | FBgn0051515 | CG31515       | -            |
| 50 | FBgn0051659 | CG31659       | -            |
| 51 | FBgn0051680 | CG31680       | -            |
| 52 | FBgn0051704 | CG31704       | -            |
| 53 | FBgn0032122 | CG31883       | -            |
| 54 | FBgn0052833 | CG32833       | -            |
| 55 | FBgn0054002 | CG34002       | -            |
| 56 | FBgn0054033 | CG34033       | -            |
| 57 | FBgn0054034 | CG34034       | -            |
| 58 | FBgn0054051 | CG34051       | -            |
| 59 | FBgn0083965 | CG34129       | -            |
| 60 | FBgn0083966 | CG34130       | -            |
| 61 | FBgn0260766 | CG42564       | -            |
| 62 | FBgn0263024 | CG43319       | -            |
| 63 | FBgn0034229 | CG4847        | -            |
| 64 | FBgn0030828 | CG5162        | -            |
| 65 | FBgn0036186 | CG6071        | -            |
| 66 | FBgn0038918 | <i>Qsox3</i>  | -            |
| 67 | FBgn0031746 | CG9029        | -            |
| 68 | FBgn0035216 | CG9168        | -            |
| 69 | FBgn0039597 | CG9997        | -            |
| 70 | FBgn0004629 | <i>Cys</i>    | -            |
| 71 | FBgn0250832 | <i>Dup99B</i> | -            |
| 72 | FBgn0004181 | <i>Ebp</i>    | -            |
| 73 | FBgn0011694 | <i>EbpII</i>  | -            |
| 74 | FBgn0000592 | <i>Est-6</i>  | GBI_00242-RA |
| 75 | FBgn0030932 | <i>Ggt-1</i>  | GBI_03406-RA |

---

---

|     |             |                    |              |
|-----|-------------|--------------------|--------------|
| 76  | FBgn0041629 | <i>Hexo2</i>       | GBI_01177-RA |
| 77  | FBgn0040098 | <i>lectin-29Ca</i> | -            |
| 78  | FBgn0040097 | <i>lectin-30A</i>  | -            |
| 79  | FBgn0040093 | <i>lectin-46Ca</i> | -            |
| 80  | FBgn0040092 | <i>lectin-46Cb</i> | -            |
| 81  | FBgn0028416 | <i>Met75Ca</i>     | -            |
| 82  | FBgn0260745 | <i>mfas</i>        | GBI_04258-RA |
| 83  | FBgn0011668 | <i>Mst57Da</i>     | -            |
| 84  | FBgn0011670 | <i>Mst57Dc</i>     | -            |
| 85  | FBgn0053126 | <i>NLaz</i>        | GBI_14572-RA |
| 86  | FBgn0038198 | <i>Npc2b</i>       | GBI_06029-RA |
| 87  | FBgn0052190 | <i>NUCB1</i>       | GBI_02944-RA |
| 88  | FBgn0043539 | <i>Obp22a</i>      | -            |
| 89  | FBgn0043530 | <i>Obp51a</i>      | -            |
| 90  | FBgn0034471 | <i>Obp56e</i>      | GBI_19371-RA |
| 91  | FBgn0043533 | <i>Obp56f</i>      | -            |
| 92  | FBgn0034474 | <i>Obp56g</i>      | GBI_14450-RA |
| 93  | FBgn0043532 | <i>Obp56i</i>      | -            |
| 94  | FBgn0283509 | <i>Phm</i>         | GBI_06121-RA |
| 95  | FBgn0069354 | <i>Porin2</i>      | -            |
| 96  | FBgn0030362 | <i>regucalcin</i>  | GBI_08029-RA |
| 97  | FBgn0033868 | <i>S-Lap7</i>      | -            |
| 98  | FBgn0028944 | <i>Semp1</i>       | -            |
| 99  | FBgn0037036 | <i>Sems</i>        | -            |
| 100 | FBgn0259949 | <i>Sfp23F</i>      | -            |
| 101 | FBgn0259951 | <i>Sfp24Ba</i>     | -            |
| 102 | FBgn0259952 | <i>Sfp24Bb</i>     | -            |
| 103 | FBgn0261054 | <i>Sfp24Bc</i>     | -            |
| 104 | FBgn0259953 | <i>Sfp24Bd</i>     | -            |
| 105 | FBgn0259956 | <i>Sfp24C1</i>     | -            |
| 106 | FBgn0259958 | <i>Sfp24F</i>      | -            |
| 107 | FBgn0259959 | <i>Sfp26Ac</i>     | -            |
| 108 | FBgn0261055 | <i>Sfp26Ad</i>     | -            |
| 109 | FBgn0259964 | <i>Sfp33A3</i>     | -            |
| 110 | FBgn0259965 | <i>Sfp35C</i>      | -            |
| 111 | FBgn0261058 | <i>Sfp38D</i>      | -            |
| 112 | FBgn0259966 | <i>Sfp51E</i>      | -            |
| 113 | FBgn0259969 | <i>Sfp65A</i>      | -            |
| 114 | FBgn0259970 | <i>Sfp70A4</i>     | -            |
| 115 | FBgn0261059 | <i>Sfp78E</i>      | -            |
| 116 | FBgn0259975 | <i>Sfp87B</i>      | -            |
| 117 | FBgn0003034 | <i>SP</i>          | -            |
| 118 | FBgn0037038 | <i>SP191</i>       | -            |

---

|     |             |                 |               |
|-----|-------------|-----------------|---------------|
| 119 | FBgn0083141 | <i>Spn28B</i>   | -             |
| 120 | FBgn0028987 | <i>Spn28F</i>   | GBI_00301-RB  |
| 121 | FBgn0028986 | <i>Spn38F</i>   | GBI_05353-RD  |
| 122 | FBgn0028988 | <i>Spn42Dd</i>  | -             |
| 123 | FBgn0052203 | <i>Spn75F</i>   | -             |
| 124 | FBgn0036969 | <i>Spn77Bb</i>  | -             |
| 125 | FBgn0036970 | <i>Spn77Bc</i>  | -             |
| 126 | FBgn0051413 | <i>Qsox4</i>    | -             |
| 127 | FBgn0030589 | CG9519          | -             |
| 128 | FBgn0085476 | CG34447         | -             |
| 129 | FBgn0029804 | CG3097          | GBI_21205-RA* |
| 130 | FBgn0262621 | CG43145         | -             |
| 131 | FBgn0053121 | <i>Spn28Db</i>  | -             |
| 132 | FBgn0035042 | CG3640          | -             |
| 133 | FBgn0083938 | <i>BG642163</i> | -             |
| 134 | FBgn0262571 | CG43111         | -             |

\* In addition to the single-direction BLASTX, a reciprocal BLASTX between *G. bimaculatus* and *D. melanogaster* was conducted for SFP genes. Each match that did not have a best hit reciprocal match (not yielding the exact same match in the top three hits) is indicated by an asterisk (\*). Thus, these are lower confidence putative SFP orthologs in *G. bimaculatus*.

**Table S8.** The number of orthologs identified between *G. bimaculatus* (GB) and *G. assimilis* (GA) and the outgroup *L. kohalensis* (LK). Among the orthologs studied for GB-GA paired analysis, the number of genes also having an LK ortholog after three-way reciprocal BLASTX and after excluding genes with dN or dS>3 are shown (designated as high confidence). Branch-site analysis results including 2XΔL are shown for all genes studied and for sex-biased TSSB genes (or all genes for the brain) and universally unbiased genes. Genes not belonging to any of these categories were excluded (Table S3).

|                                                    | All<br>genes       | Gonad-biased <sub>TSSB</sub> |                   | Somatic reproductive<br>system-biased <sub>TSSB</sub> |                 | Ventral-biased <sub>TSSB</sub> |                 | Brain-biased <sub>ALL</sub> |                 | Universally<br>unbiased |
|----------------------------------------------------|--------------------|------------------------------|-------------------|-------------------------------------------------------|-----------------|--------------------------------|-----------------|-----------------------------|-----------------|-------------------------|
| <u>Identification of three-species orthologs</u>   |                    | Ovary-<br>biased             | Testis-<br>biased | Female-<br>biased                                     | Male-<br>biased | Female-<br>biased              | Male-<br>biased | Female-<br>biased           | Male-<br>biased |                         |
| N GB-GA-LK putative orthologs (BLASTX)             | 4,523 <sup>a</sup> | 1,300                        | 597               | 62                                                    | 59              | 49                             | 53              | 15                          | 15              | 2,171                   |
| N with dN and dS < 3 (High confidence)             | 1,933 <sup>a</sup> | 553                          | 250               | 33                                                    | 20              | 14                             | 31              | 6                           | 4               | 927                     |
| <u>N branch-site test (2XΔlnL) P&lt;0.05</u>       | 220 <sup>a</sup>   | 65                           | 24                | 6                                                     | 1               | 1                              | 7               | 1                           | 2               | 101                     |
| Percent of studied genes statistically significant | 11.38%             | 11.75%                       | 9.60%             | 18.18%                                                | 5.00%           | 7.14%                          | 22.58%          | NA <sup>b</sup>             | NA <sup>b</sup> | 10.90%                  |

<sup>a</sup>The total is for all genes with orthologs, including some not belonging to any of the sub-categories. <sup>b</sup>Too few genes were available to study for a reliable estimate.



## Text File S1

### Assembly of *G. assimilis* RNA-seq data

To assess dN/dS, we compared the annotated genes in *G. bimaculatus* to the CDS list generated for *G. assimilis*. Applying Trinity and PlantTribes (see Methods) to the trimmed reads in Table S2, we obtained 33,089 non-redundant transcripts with a median and mean length of 540 bp and 784.3 bp respectively (standard error=30.3). The BUSCO score (Seppey et al., 2019) to the Arthropoda conserved gene set of 1,066 genes, showed 86.7% CDS had complete sequence matches, 8.6% were fragmented matches, and 4.7% were missing. The latter may represent gene losses in this species, and/or genes excluded from the assembly. Thus, this suggests high efficiency of the assembly spanning a major portion of arthropod genes. From this list, we used ORF predictor with *G. bimaculatus* CDS as a reference and BLASTX to identify *G. assimilis* CDS. We found 25,128 CDS (including isoforms) with a start codon and no unknown or ambiguous nucleotides, which were used for analyses. Reciprocal BLASTX of the 15,539 *G. bimaculatus* CDS to the *G. assimilis* CDS yielded 7,919 putative orthologs between the two species ( $e < 10^{-6}$  in both forward and reverse matches). Retaining only those putative ortholog matches that after alignment had both dN and dS values  $< 1.5$ , and thus were unsaturated, yielded a total of 7,220 high confidence between-species orthologs that were used for all our dN/dS analyses.

### Comparison of sex-biased gonadal expression in *G. bimaculatus* and *G. assimilis*

As described in our main text, our core target for expression analysis was *G. bimaculatus*, which has an assembled genome with complete or near complete CDS (Ylla et al., 2021), and *G. assimilis* was used primarily as a reference for assessment of protein divergence. Nonetheless, we assessed the degree of conservation of gene expression between species for the 7,220 genes with orthologs for the gonads (largest N values of all tissues, Table S3) between these two species. The results showed that gene expression in *G. assimilis* gonads was strongly correlated to that in *G. bimaculatus*, with Spearman's  $R=0.780$  and  $0.775$  ( $P < 2 \times 10^{-7}$ ) for ovary and testis expression respectively (Fig. S2AB). In addition, 65.9 and 65.8% of all gonadally expressed genes (among the 7,220 with orthologs) that were defined as female- and male-biased in *G. bimaculatus* (ALL genes sex-biased in testis regardless of status in other tissues,  $N=2,043$  and  $1,225$  respectively) had the same status in *G. assimilis*. This suggests substantial turnover in sex-biased status, a pattern observed for gonadal tissues in studied species of *Drosophila* (Assis et al., 2012, Whittle & Extavour, 2019b, Zhang et al., 2007, Harrison et al., 2015). Importantly, for genes with the same (conserved) sex-biased status in the two species, dN/dS was highest in testis-biased genes (median=0.127) and lower in unbiased (0.114), and ovary-biased (0.097) genes (MWU-tests  $P < 0.05$  for all paired contrasts) (Fig. S2C). Moreover, genes that were testis-biased in only one species (either *G. bimaculatus* or *G. assimilis*) and unbiased in the other species had elevated dN/dS values as compared to their ovary-biased counterparts (MWU-test  $P < 0.05$  for each contrast, Fig. S2D). Thus, the accelerated evolution of testis-biased genes is

robust to whether the sex-biased status is observed in one species, or both species, in this taxon. All our remaining analysis is using sex-biased genes from our annotated model *G. bimaculatus*.

### **Assessment of expression in male accessory glands and seminal fluid proteins**

We considered the evolution of genes specifically linked to the male accessory glands in *G. bimaculatus*, including those defined as putative orthologs to *D. melanogaster* seminal fluid proteins (SFPs; see below paragraph (Sepil et al., 2019)). First, we took a broad approach to study all male accessory gland-specific genes identified using our RNA-seq dataset (Table S1). Prior study of two species of crickets (*G. firmus* and *G. pennsylvanicus*) identified transcripts from the male accessory glands or SFPs, whereby some were suggested to evolve rapidly (Andres et al., 2006, Andres et al., 2013). Herein, we have the advantages of large-scale RNA-seq data from multiple tissue types, and an annotated *G. bimaculatus* genome (N=15,539 CDS) (Ylla et al., 2021), to identify male-accessory gland-specific genes in this species. We report a total of 30 genes expressed in the male accessory glands with no expression (0 FPKM) in all eight other studied male and female tissues (Table S1).

Functional predictions of the 30 male accessory gland-specific genes using *D. melanogaster* orthologs (Table S6,  $e < 0.001$ , see Methods) revealed seven genes with a match. Two of these *G. bimaculatus* genes are predicted orthologs of *painless* and *Sox100B*, which have functions in male reproduction in *D. melanogaster*; the former is involved in courtship and olfactory signalling (Table S6). Both genes were expressed at low levels (FPKM < 1) in male accessory glands in *G. bimaculatus*. Only one of the 30 accessory gland specific genes had a match in the two *Gryllus* species (3.33%, Table S6, which had very strict match criteria, see Methods). Several of the *G. bimaculatus* accessory gland genes with no *G. assimilis* or *D. melanogaster* ortholog matches had relatively high expression levels (e.g., 16 to 347 FPKM; Table S6), and we speculate they could comprise orphan genes that have evolved essential male sexual functions specifically in *G. bimaculatus* (Tautz & Domazet-Loso, 2011, Whittle & Extavour, 2019a). Overall, the nearly complete lack of high confidence orthologs between *G. bimaculatus* and *G. assimilis* suggests there has been rapid evolution of male accessory gland specific genes resulting in similarity too low for ortholog detection using these methods. Alternatively, these results may reflect a history of some lineage-specific gene losses or gains of these rapidly changing genes (Tautz & Domazet-Loso, 2011, Haerty et al., 2007).

### *Seminal fluid proteins*

Seminal fluid proteins (SFPs) play significant roles in sperm vitality, sperm storage in the female spermatheca after mating, and in fertilization (Sepil et al., 2019). In studied systems to date, which have preferentially focused on primates and *Drosophila*, genes described as SFPs have been found to evolve rapidly and/or adaptively (Haerty et al., 2007, Swanson et al., 2001, Clark & Swanson, 2005, Torgerson et al., 2002). While it may be predicted that rapid evolution of SFPs might be more pronounced in systems where females have multiple mates (such as *G. bimaculatus*) than those that are monogamous, this expected pattern was not observed for a study

of 18 candidate SFPs in butterflies, where monogamy was unexpectedly linked to fast evolution of SFPs, perhaps due to relaxed selective constraints (Walters & Harrison, 2011). Research on SFPs in more diverse insects with well-described mating biology are thus needed (Walters & Harrison, 2011). *G. bimaculatus* has high female polyandry, complete sperm mixing, and exhibits extensive pre- and post-mating female choice (Simmons, 1986, Morrow & Gage, 2001). Using the recently available list of 134 SFPs in *D. melanogaster* (shown in Table S7, (Sepil et al., 2019)), we found that only 20 genes had identifiable putative orthologs in *G. bimaculatus* genes (14.9%). This is much lower than the 64.5% genome-wide rate of putative ortholog detection between these two species (Chi-square with Yates's correction  $P < 0.001$ ). Thus, the lack of putative SFP orthologs is consistent with especially rapid evolution (Tautz & Domazet-Loso, 2011, Haerty et al., 2007) of the SFP genes following the divergence of the lineages leading to *D. melanogaster* and *G. bimaculatus*.

Among the 20 putative *G. bimaculatus* SFP genes, seven were included among the subset of 7,220 genes with between-species orthologs in *Gryllus* (Table 4; note that none of these were among the 30 accessory gland-specific genes reported above). It has been inferred that SFPs tend to be produced in insect accessory glands, as well as in the testis or male somatic reproductive system tissues (Sepil et al., 2019). Indeed, we found that each of these seven putative *Gryllus* SFPs exhibited expression within the testis, male somatic reproductive system, and the male accessory glands (between 0.2 to 1392.5 FPKM depending on tissue, with one exception, testis for GBI\_14450-RA FPKM=0, Table 4). Significantly, for each of these seven putative cricket SFPs, we also found that the dN/dS values were consistently well above the median observed for all studied genes in the genome (which was 0.115 across all 7,220 genes, shown in Fig. 3A). Specifically, the values were 0.149 (*Phm*), 0.220 (*Npc2b*), 0.230 (*Ggt-1*), 0.250 (*regucalcin*), 0.287 (*Spn28F*), 0.344 (*Spn38F*) and 2.48 (*Obp56g*) (Table 4). Thus, the putative SFPs in the crickets studied here have evolved very rapidly, a feature shared with the SFPs that have been studied in the fellow insect *D. melanogaster* (Sepil et al., 2019, Haerty et al., 2007). It should be noted that while we consider it unlikely, we cannot exclude the possibility that some accessory gland or SFP CDS may be expressed at extremely low levels in the *G. assimilis* tissue types used for RNA-seq, causing an apparent absence of orthologs to *G. bimaculatus* in that assembly. However, we consider this unlikely given the number of tissues we assessed, including the male accessory glands (Table S2). Moreover, this would not explain the apparent paucity of *G. bimaculatus* SFP orthologs relative to those in the *D. melanogaster* genome. Thus, we suggest the absence is best explained by rapid divergence that obscures ortholog detection, and/or from gene losses or gains (Tautz & Domazet-Loso, 2011, Haerty et al., 2007). A role of positive selection for at least one SFP gene in *Gryllus* is supported by the fact that the dN/dS value was  $>1$  (was 2.5, Table 4) for the odorant binding SFP protein *Obp56g*. In *D. melanogaster*, *Obp56g* was first recognized as an SFP using proteomics of seminal fluid in mated females (Findlay et al., 2008), was later affirmed as a protein stored in male reproductive tissues (Takemori & Yamamoto, 2009) (which we have confirmed also express this gene in crickets: (Table 4)), and was stringently verified as an SFP by Sepil and colleagues (2019).

### Branch-site analysis for *G. bimaculatus*

Three-way reciprocal BLASTX of *Laupala kohalensis* to *G. bimaculatus* and *G. assimillus* yielded 4,523 genes with putative orthologs. Using free-ratio branch analyses of the three species, we found dN was largely unsaturated for the *L. kohalensis* branch, with a median of 0.10. However, dS values were particularly high (median=3.3), suggesting a high mutation rate in this organism. Including only genes with dN and dS <3 yielded 1,933 genes with confidence orthologs in *L. kohalensis* (26.7% of the 7,220 genes with *G. bimaculatus* and *G. assimillus* orthologs). This conservative approach favors study of the slowly evolving genes in each sex-biased category. We found instances of positive selection at specific sites in the *G. bimaculatus* branch for sex-biased genes from all studied tissue types (2XlnL P <0.05, Table S8). For instance, we found 11.8%, 9.6% and 10.9% of studied genes exhibited positive selection for ovary-biased<sub>TSSB</sub>, testis-biased<sub>TSSB</sub> and universally unbiased genes (2XlnL P per gene <0.05; Table S8). The use of conserved genes, however, biases these testis-biased estimates of positive selection downward (as fast evolving genes are excluded more often: 23.7% of testis-biased genes had three-way orthologs, versus 29.8% for ovary-biased genes). Further, while the number of genes, and thus three-way orthologs, were uncommon outside the gonads (N=4-33 depending on tissue; Table S8), we found that more than three times as many female-biased than male-biased somatic reproductive system genes exhibited branch-site selection (18.2% versus 5%; but this was not statistically significant, Chi-square P=0.17, Table S8), suggesting that this narrowed level of analysis (branch-site analysis of conserved genes), may concur with the notion that some genes from the female reproductive tract and/or spermathecae, which store sperm after mating, tend to evolve adaptively due to sexual selection pressures (Swanson et al., 2004, Prokupek et al., 2008). Future studies using more closely related cricket genomes as data emerge will be needed to enhance the power of detecting branch-site positive selection using branch-site analysis.

## References

- Andres, J. A., Larson, E. L., Bogdanowicz, S. M. & Harrison, R. G. 2013. Patterns of transcriptome divergence in the male accessory gland of two closely related species of field crickets. *Genetics* **193**: 501-13.
- Andres, J. A., Maroja, L. S., Bogdanowicz, S. M., Swanson, W. J. & Harrison, R. G. 2006. Molecular evolution of seminal proteins in field crickets. *Mol Biol Evol* **23**: 1574-84.
- Assis, R., Zhou, Q. & Bachtrog, D. 2012. Sex-biased transcriptome evolution in *Drosophila*. *Genome Biol Evol* **4**: 1189-200.
- Clark, N. L. & Swanson, W. J. 2005. Pervasive adaptive evolution in primate seminal proteins. *PLoS Genet* **1**: e35.
- Findlay, G. D., Yi, X., Maccoss, M. J. & Swanson, W. J. 2008. Proteomics reveals novel *Drosophila* seminal fluid proteins transferred at mating. *PLoS Biol* **6**: e178.
- Haerty, W., Jagadeeshan, S., Kulathinal, R. J., Wong, A., Ram, K. R., Sirot, L. K., Levesque, L., Artieri, C. G., Wolfner, M. F., Civetta, A. & Singh, R. S. 2007. Evolution in the fast lane: rapidly evolving sex-related genes in *Drosophila*. *Genetics* **177**: 1321-1335.
- Harrison, P. W., Wright, A. E., Zimmer, F., Dean, R., Montgomery, S. H., Pointer, M. A. & Mank, J. E. 2015. Sexual selection drives evolution and rapid turnover of male gene expression. *Proc Natl Acad Sci U S A* **112**: 4393-8.
- Huang da, W., Sherman, B. T. & Lempicki, R. A. 2009. Systematic and integrative analysis of large gene lists using DAVID bioinformatics resources. *Nature Protocols* **4**: 44-57.
- Morrow, E. H. & Gage, M. G., H 2001. Sperm competition experiments between lines of crickets producing different sperm lengths. *Proceedings of the Royal Society of London. Series B: Biological Sciences* **268**: 2281-6.
- Prokupek, A., Hoffmann, F., Eyun, S. I., Moriyama, E., Zhou, M. & Harshman, L. 2008. An evolutionary expressed sequence tag analysis of *Drosophila* spermatheca genes. *Evolution* **62**: 2936-47.
- Sepil, I., Hopkins, B. R., Dean, R., Thezenas, M. L., Charles, P. D., Konietzny, R., Fischer, R., Kessler, B. M. & Wigby, S. 2019. Quantitative Proteomics Identification of Seminal Fluid Proteins in Male *Drosophila melanogaster*. *Mol Cell Proteomics* **18**: S46-S58.
- Seppey, M., Manni, M. & Zdobnov, E. M. 2019. BUSCO: Assessing Genome Assembly and Annotation Completeness. *Methods Mol Biol* **1962**: 227-245.
- Simmons, L. W. 1986. Female choice in the field cricket *Gryllus bimaculatus* (De Geer). *Animal Behavior* **34**: 1463-1470.
- Swanson, W. J., Clark, A. G., Waldrip-Dail, H. M., Wolfner, M. F. & Aquadro, C. F. 2001. Evolutionary EST analysis identifies rapidly evolving male reproductive proteins in *Drosophila*. *Proceedings of the National Academy of Sciences of the United States of America* **98**: 7375-7379.
- Swanson, W. J., Wong, A., Wolfner, M. F. & Aquadro, C. F. 2004. Evolutionary expressed sequence tag analysis of *Drosophila* female reproductive tracts identifies genes subjected to positive selection. *Genetics* **168**: 1457-65.
- Takemori, N. & Yamamoto, M. T. 2009. Proteome mapping of the *Drosophila melanogaster* male reproductive system. *Proteomics* **9**: 2484-93.
- Tautz, D. & Domazet-Loso, T. 2011. The evolutionary origin of orphan genes. *Nature Reviews Genetics* **12**: 692-702.

- Torgerson, D. G., Kulathinal, R. J. & Singh, R. S. 2002. Mammalian sperm proteins are rapidly evolving: evidence for positive selection in functionally diverse genes. *Molecular Biology and Evolution* **2002**.
- Walters, J. R. & Harrison, R. G. 2011. Decoupling of rapid and adaptive evolution among seminal fluid proteins in heliconius butterflies with divergent mating systems. *Evolution* **65**: 2855-71.
- Whittle, C. A. & Extavour, C. G. 2019a. Contrasting patterns of molecular evolution in metazoan germ line genes. *BMC Evol Biol* **19**: 53 (doi: 10.1186/s12862-019-1363-x).
- Whittle, C. A. & Extavour, C. G. 2019b. Selection shapes turnover and magnitude of sex-biased expression in *Drosophila* gonads. *BMC Evol Biol* **19**: 60 (doi: 10.1186/s12862-019-1377-4).
- Ylla, G., Nakamura, T., Itoh, T., Kajitani, R., Toyoda, A., Tomonari, S., Bando, T., Ishimaru, Y., Watanabe, T., Fuketa, M., Matsuoka, Y., Barnett, A. A., Noji, S., Mito, T. & Extavour, C. G. 2021. Insights into the genomic evolution of insects from cricket genomes. *Communications Biology* **in press**.
- Zhang, Y., Sturgill, D., Parisi, M., Kumar, S. & Oliver, B. 2007. Constraint and turnover in sex-biased gene expression in the genus *Drosophila*. *Nature* **450**: 233-7.
